# Supplementary material for: Calcium-sensing stromal interaction molecule 2 upregulates nuclear factor of activated T cells 1 and transforming growth factor-β signaling to promote breast cancer metastasis
Source: Breast Cancer Res. 2019 Aug 29;21:99. doi: 10.1186/s13058-019-1185-1 (PMC6716836; doi:10.1186/s13058-019-1185-1)
Supplement: Supplementary file 3 — IRB Approval Document for Human Breast Cancer Tissue Microarray Assessments. (PDF 2603 kb) [file 13058_2019_1185_MOESM3_ESM.pdf]

# 河南省通许县人民医院伦理委员会审核意见书

|      |                                                                                                                                                                                                                                                                                                                                                                                                                                                                                                                                                                                                                                                                                                                           |       |       |
|------|---------------------------------------------------------------------------------------------------------------------------------------------------------------------------------------------------------------------------------------------------------------------------------------------------------------------------------------------------------------------------------------------------------------------------------------------------------------------------------------------------------------------------------------------------------------------------------------------------------------------------------------------------------------------------------------------------------------------------|-------|-------|
| 项目名称 | 人体组织生物样本采集                                                                                                                                                                                                                                                                                                                                                                                                                                                                                                                                                                                                                                                                                                                |       |       |
| 任务来源 | 陕西超英生物科技有限公司<br>(完成国家 863 计划项目)                                                                                                                                                                                                                                                                                                                                                                                                                                                                                                                                                                                                                                                                                           | 项目编号  |       |
| 承办单位 | 通许县人民医院                                                                                                                                                                                                                                                                                                                                                                                                                                                                                                                                                                                                                                                                                                                   | 项目负责人 | 李军、步雪 |
| 审核结果 | <p>参加伦理委员会会议 <u>6</u> 人, 投票结果:</p> <p>1, 同意 <u>6</u> 票;                      2, 做必要的修正后同意 ____ 票;</p> <p>3, 不同意 ____ 票;                    4, 做必要的修正后再议 ____ 票;</p> <p>5, 终止 ____ 票;                      6, 暂停已批准的实验 ____ 票;</p> <p>伦理委员会审查意见:</p> <p>1, 该项目的知情同意书符合项目规范, 知情同意程序合理。</p> <p>2, 此项目的实施不增加患者的临床风险。</p> <p>3, 此项目收集的标本, 仅被用于科研项目, 或经相关主管部门审核通过的国际国内相关产品的研发合作项目, 而非不合规范的商业用途。</p> <p>4, 病人的隐私权在项目设计中得到了充分的保护。</p> <div style="display: flex; justify-content: space-between; margin-top: 20px;"> <div> <p>记录人签名: <u>马莉</u></p> <p>2004年5月10日</p> </div> <div> <p>主任委员会签名: <u>沈永军</u></p> 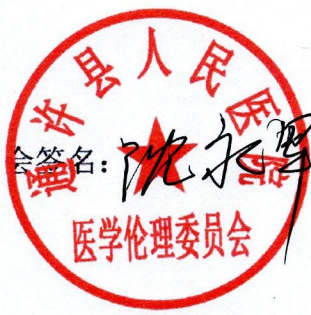 <p>2004年5月10日</p> </div> </div> |       |       |
